# Supplementary material for: The Iso2k Database: A global compilation of paleo-δ 18 O and δ 2 Hrecords to aid understanding of Common Era climate
Source: Copernicus journal article supplement (doi:10.5194/essd-2020-5), 2020-02-05
Supplement: Supplementary file [file essd-2020-5-AC1-supplement.pdf]

EC1: ['editorial comment'](#), Attila Demény, 02 Apr 2020

**Editorial Comment #1:**

**The reviews (thanks to the reviewers and to the editor) are generally positive, but there are important comments and suggestions that should be taken into consideration during the revision. Looking forward to the revised manuscript**

Response to Editorial Comment #1:

We are pleased that the reviews are generally positive, and we found the feedback very helpful. In our responses to each comment, we have explained the changes that can be expected in order to address the reviewers' and editors' comments. We thank the reviewers and the editors for the constructive changes they have suggested to this manuscript.

- Bronwen Konecky  
On behalf of all authors
